# Supplementary material for: Independent validation of the prognostic value of cancer stem cell marker expression and hypoxia-induced gene expression for patients with locally advanced HNSCC after postoperative radiotherapy
Source: PubMed Central journal article supplement — Clin Transl Radiat Oncol. 2016 Dec 22;1:19–26. doi: 10.1016/j.ctro.2016.10.002 (PMC5893482; doi:10.1016/j.ctro.2016.10.002), 2016-12-22
Supplement: mmc1.pdf [file mmc1.pdf]

Supplementary Table 1: Hypoxia gene signatures.

| Toustrup et al.<br><b>15-gene signature</b> | Eustace et al.<br><b>26-gene signature</b> |
|---------------------------------------------|--------------------------------------------|
| ADM                                         | ALDOA                                      |
| ALDOA                                       | ANGPTL4                                    |
| ANKRD37                                     | ANLN                                       |
| BNIP3                                       | BNC1                                       |
| BNIP3L                                      | C20orf20 (MRGBP)                           |
| C3orf28 (FAM162A)                           | CA9                                        |
| EGLN3                                       | CDKN3                                      |
| KCTD11                                      | COL4A6                                     |
| LOX                                         | DCBLD1                                     |
| NDRG1                                       | ENO1                                       |
| P4HA1                                       | FAM83B                                     |
| P4HA2                                       | FOSL1                                      |
| PDK1                                        | GNAI1                                      |
| PFKFB3                                      | HIG2 (HILPDA)                              |
| SLC2A1                                      | KCTD11                                     |
|                                             | KRT17                                      |
| <b>Reference genes</b>                      | LDHA                                       |
| ACTR3                                       | MPRS17                                     |
| NDFIP1                                      | P4HA1                                      |
| RPL37A                                      | PGAM1                                      |
|                                             | PGK1                                       |
|                                             | SDC1                                       |
|                                             | SLC16A1                                    |
|                                             | SLC2A1                                     |
|                                             | TPI1                                       |
|                                             | VEGFA                                      |
|                                             | <b>Reference genes</b>                     |
|                                             | B2M                                        |
|                                             | GNB2L1                                     |
|                                             | RPL11                                      |

Supplementary Table 2: Cluster centres (after normalisation with reference genes) for less and more hypoxic tumours based on the training cohort.

| Gene              | 15-gene signature |              | Gene             | 26-gene signature |              |
|-------------------|-------------------|--------------|------------------|-------------------|--------------|
|                   | Less hypoxic      | More hypoxic |                  | Less hypoxic      | More hypoxic |
| ADM               | -2.6347           | -1.2839      | ALDOA            | -0.4379           | 0.1030       |
| ALDOA             | 0.8366            | 1.3703       | ANGPTL4          | -7.3683           | -6.3079      |
| ANKRD37           | -4.8115           | -4.0562      | ANLN             | -5.4528           | -4.7166      |
| BNIP3             | -4.0586           | -3.1231      | BNC1             | -6.0501           | -4.2631      |
| BNIP3L            | -2.1733           | -1.8368      | C20orf20 (MRGBP) | -5.7590           | -5.1675      |
| C3orf28 (FAM162A) | -2.9147           | -2.4720      | CA9              | -7.5868           | -6.4287      |
| EGLN3             | -4.4919           | -3.0034      | CDKN3            | -5.6103           | -5.1894      |
| KCTD11            | -2.7763           | -1.8137      | COL4A6           | -9.2150           | -7.3027      |
| LOX               | -3.9948           | -2.7881      | DCBLD1           | -6.9690           | -5.7177      |
| NDRG1             | -0.0891           | 1.4563       | ENO1             | -1.2078           | -0.6848      |
| P4HA1             | -4.2572           | -3.6907      | FAM83B           | -5.5478           | -4.3167      |
| P4HA2             | -3.2070           | -2.4074      | FOSL1            | -6.6483           | -4.6834      |
| PDK1              | -3.5854           | -3.5530      | GNAI1            | -5.0089           | -3.9085      |
| PFKFB3            | -2.3565           | -1.7530      | HIG2 (HILPDA)    | -5.7354           | -4.8604      |
| SLC2A1            | -1.4776           | 0.0190       | KCTD11           | -4.1258           | -3.0605      |
|                   |                   |              | KRT17            | -0.2975           | 2.2981       |
|                   |                   |              | LDHA             | -7.6863           | -6.8761      |
|                   |                   |              | MPRS17           | -5.0850           | -4.5702      |
|                   |                   |              | P4HA1            | -5.5157           | -4.9698      |
|                   |                   |              | PGAM1            | -2.2797           | -1.7089      |
|                   |                   |              | PGK1             | -2.2303           | -1.6821      |
|                   |                   |              | SDC1             | -3.2086           | -2.2377      |
|                   |                   |              | SLC16A1          | -5.1258           | -3.9567      |
|                   |                   |              | SLC2A1           | -2.7382           | -1.3110      |
|                   |                   |              | TPI1             | -8.0022           | -7.5209      |
|                   |                   |              | VEGFA            | -3.8111           | -3.1449      |
